# Supplementary material
Source: PubMed Central journal article supplement (PMC6037485)
Supplement: NIHMS971557-supplement-TOC_graphic_statement.pdf [file NIHMS971557-supplement-TOC_graphic_statement.pdf]

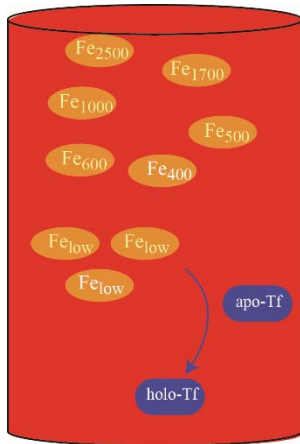

The labile iron pool in blood consist of complexes with masses of 400 – 2500 Daltons that are not ferric citrate.
